# Supplementary material for: Excessive Intake of Longan Arillus Alters Gut Homeostasis and Aggravates Colitis in Mice
Source: Research Square preprint supplement (doi:10.21203/rs.3.rs-117893/v1), 2020-12-03
Supplement: Supplementary file 1 [file 3c4321c937b397aa2351d3ad.docx]

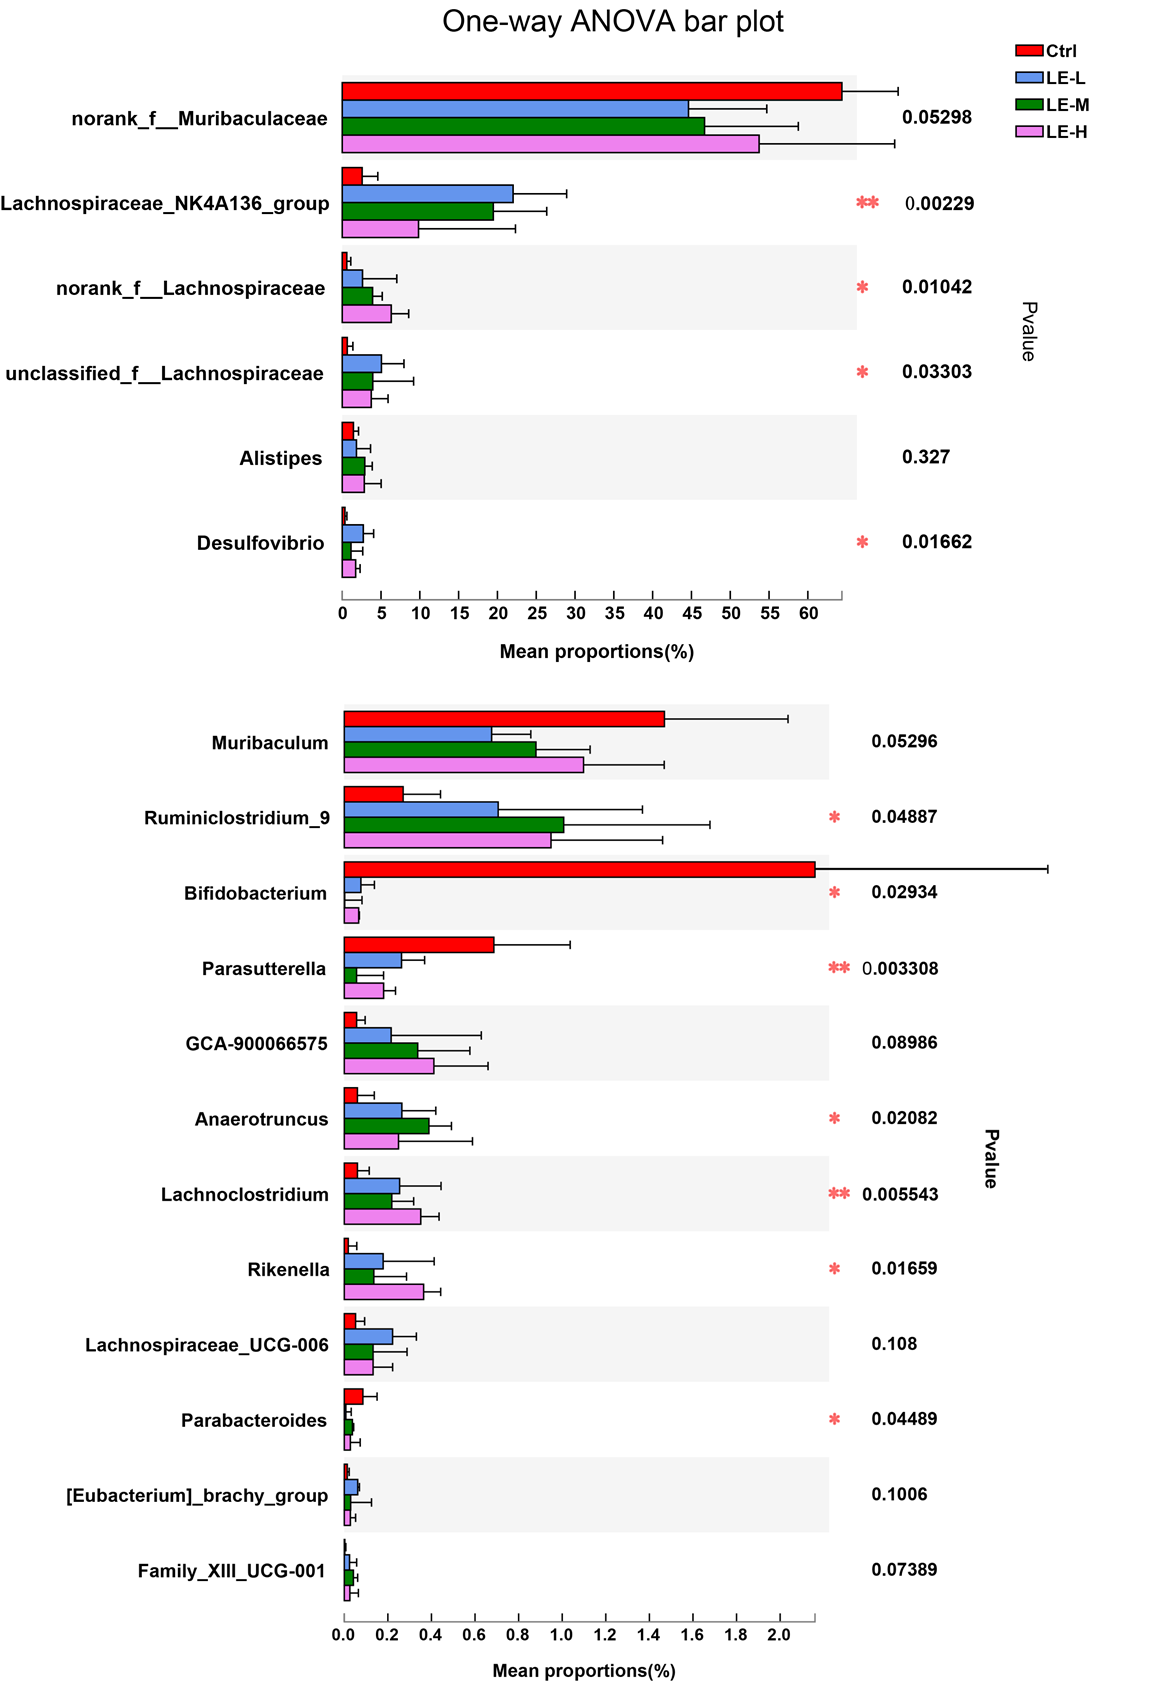


**Additional Information Fig. S1.** Generic difference among groups after 2 weeks of *Longan* extract treatment. **p* < 0.05, ***p* < 0.01, by one-way ANOVA.


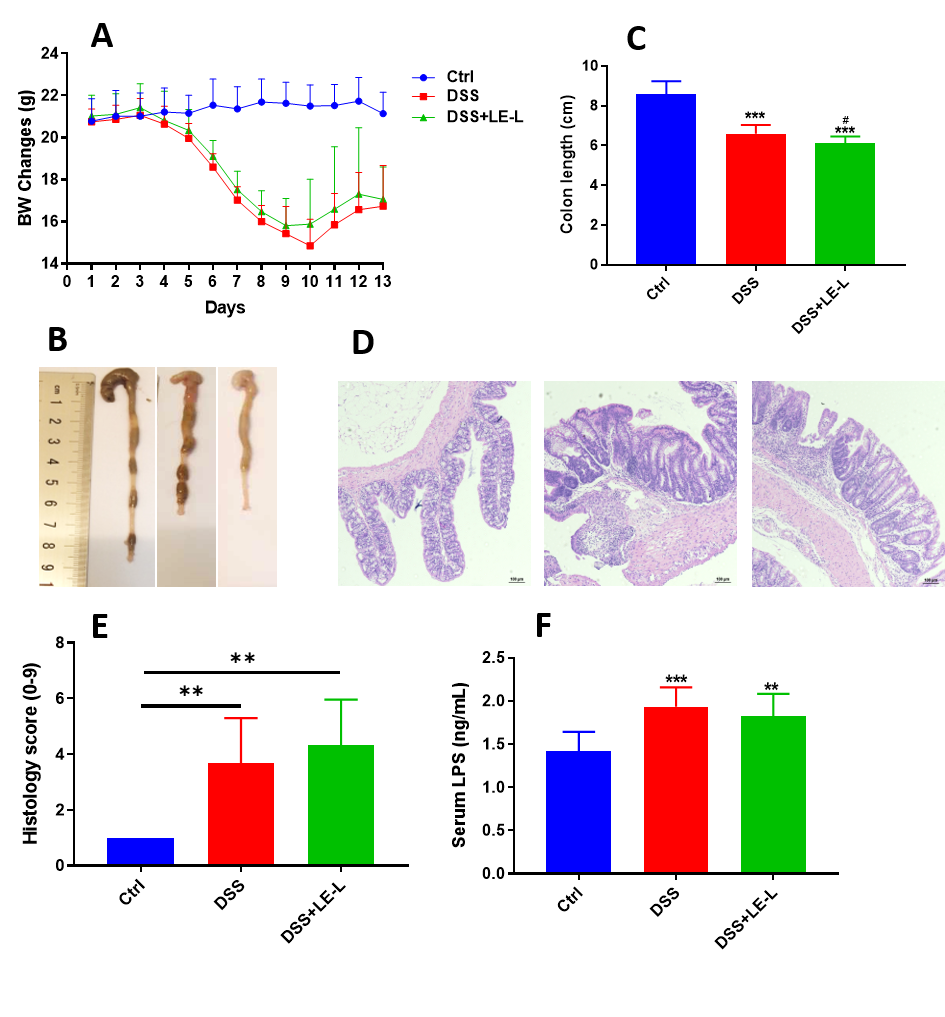
 **Additional Information Fig. S2.** Intake of longan extract (LE) at 4 g/kg did not aggravate DSS-induced colitis in mice. (A) Body weight changes. (B) Colon length. (C) Statistics for colon length. (D) Histopathological changes of colon tissues after H&E staining. (E) Histological score based on H&E stained colon sections. (F) Serum level of LPS. Data are presented as mean ± SD. **p* < 0.05, ***p* < 0.01, compared to Ctrl.
